# Supplementary material
Source: MDPI journal article supplement (https://www.mdpi.com/2073-445X/11/7/1084)
Supplement: s1 [file s1]

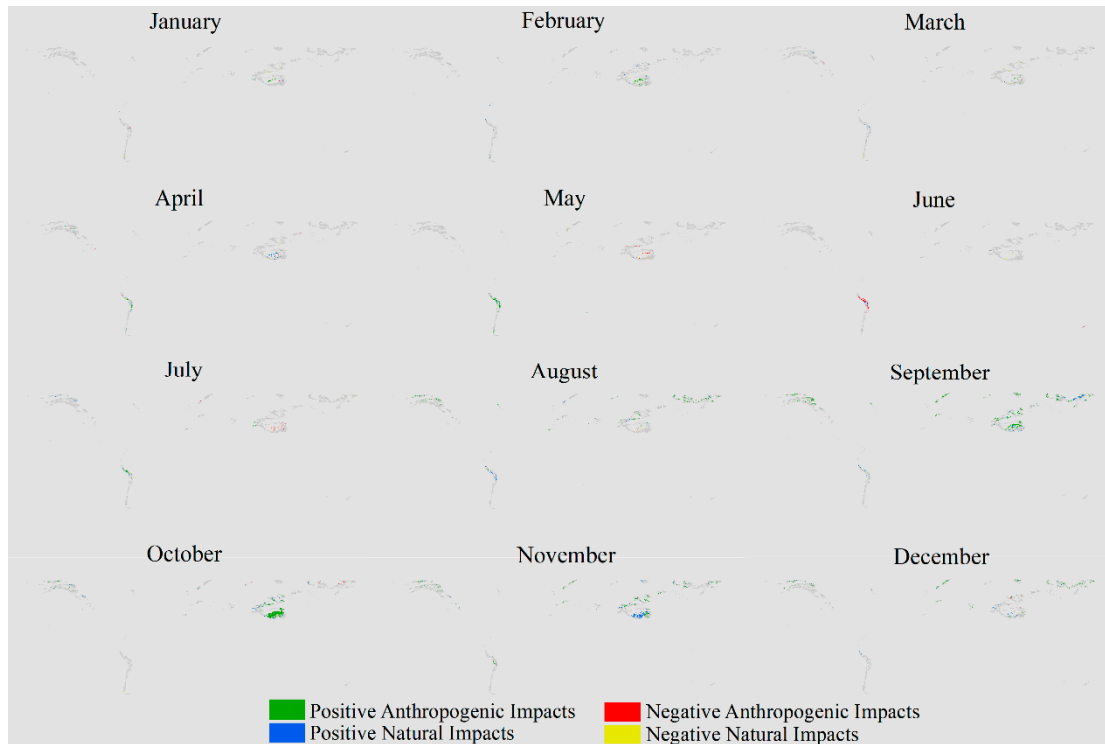

**Supplementary Figure S1** The residual analysis of anthropogenic activities and natural impacts in global alpine regions

**Supplementary Table S1** Number of grids with significant changes in vegetation caused by anthropogenic activities and major natural factors

| Month | Positive effects<br>of major natural<br>factors | Negative effects<br>of major natural<br>factors | Positive effects of<br>anthropogenic<br>activities | Negative effects of<br>anthropogenic<br>activities |
|-------|-------------------------------------------------|-------------------------------------------------|----------------------------------------------------|----------------------------------------------------|
| 1     | 185                                             | 21                                              | 71                                                 | 49                                                 |
| 2     | 306                                             | 12                                              | 90                                                 | 28                                                 |
| 3     | 158                                             | 24                                              | 67                                                 | 62                                                 |
| 4     | 199                                             | 69                                              | 100                                                | 51                                                 |
| 5     | 263                                             | 134                                             | 47                                                 | 53                                                 |
| 6     | 285                                             | 271                                             | 77                                                 | 28                                                 |
| 7     | 166                                             | 116                                             | 77                                                 | 68                                                 |
| 8     | 752                                             | 42                                              | 240                                                | 60                                                 |
| 9     | 1632                                            | 5                                               | 481                                                | 18                                                 |
| 10    | 1730                                            | 75                                              | 252                                                | 35                                                 |
| 11    | 852                                             | 3                                               | 691                                                | 16                                                 |
| 12    | 577                                             | 36                                              | 192                                                | 27                                                 |
